# Supplementary material for: Effect of rodent density on tick and tick-borne pathogen populations: consequences for infectious disease risk
Source: Parasit Vectors. 2020 Jan 20;13:34. doi: 10.1186/s13071-020-3902-0 (PMC6971888; doi:10.1186/s13071-020-3902-0)
Supplement: Supplementary file 4 — Additional file 4: Table S1. Daily temperature data from September 2012 to December 2015 collected from the nearest weather station (Deelen, KNMI, the Netherlands). Text S1. Primers and probes for detection of B. microti and S. ixodetis, and qPCR protocol. Table S2. Density of nymphs and number of analyzed nymphs for microorganisms per treatment, month and year. Table S3. Density of rodents and number of analyzed individuals for microorganisms per rodent species, treatment, month and year. Table S4. Prevalences of tick-borne microorganisms in rodents and nymphs. Table S5. All tested models for prediction of density of nymphs (DON), nymphal infection prevalence (NIP), and density of infected nymphs (DIN). Table S6. Full equations for the best fitting models for prediction of density of nymphs (DON), nymphal infection prevalence (NIP), and density of infected nymphs (DIN). [file 13071_2020_3902_MOESM4_ESM.xlsx]

## Sheet: Table S1
Additional file 4: Table S1. Daily temperature data from September 2012 to December 2015 collected from the nearest weather station (Deelen, KNMI, the Netherlands).
Date	Daily mean temperature °C	Min temperature	Max temperature
2012-09-01	12.3	4.4	19.2
2012-09-02	15.5	10.2	19.6
2012-09-03	16.7	10.8	22.9
2012-09-04	17.3	8.9	24.5
2012-09-05	15.4	11.5	19.5
2012-09-06	13.7	8.8	18.3
2012-09-07	16.5	9.9	23.4
2012-09-08	17.4	10.5	24.6
2012-09-09	19.9	11.2	28.5
2012-09-10	18.4	13.6	23.4
2012-09-11	15	9.7	17.8
2012-09-12	12.2	8	16.1
2012-09-13	12.8	10	17.4
2012-09-14	12.5	10.4	16.1
2012-09-15	13.2	7.9	19.2
2012-09-16	13.5	8.1	19.1
2012-09-17	15.8	11.1	20.3
2012-09-18	12.3	7.1	17.5
2012-09-19	8.6	4.4	15.3
2012-09-20	9.9	4	15.5
2012-09-21	11	6	15.6
2012-09-22	9.7	2.5	15.4
2012-09-23	8.5	1.3	13.8
2012-09-24	13.9	9.1	21.1
2012-09-25	13	10.6	16
2012-09-26	12.7	10.1	15.5
2012-09-27	11.9	9	15
2012-09-28	12.6	9.2	16.2
2012-09-29	11.7	7	16
2012-09-30	11.1	6	16.6
2012-10-01	13.4	8.3	18.2
2012-10-02	13.8	12.2	16.6
2012-10-03	12.4	10	14.9
2012-10-04	10.8	9.4	14.4
2012-10-05	12.3	9.1	16.2
2012-10-06	9.1	2	13.9
2012-10-07	6.5	0.7	14.2
2012-10-08	7.4	0.4	13.8
2012-10-09	5.8	-0.3	13.3
2012-10-10	7.2	0.7	13.5
2012-10-11	9.3	4.4	14.2
2012-10-12	10.4	6.6	14.3
2012-10-13	8.5	6.3	11.7
2012-10-14	7.8	5.7	11.5
2012-10-15	9.7	6.5	13.2
2012-10-16	9.9	7.8	13.3
2012-10-17	11.3	6.9	15
2012-10-18	16.1	13.5	19.8
2012-10-19	17.1	13.6	21.7
2012-10-20	15.2	13.1	17
2012-10-21	13.6	12.5	15.3
2012-10-22	15.6	10.2	22.2
2012-10-23	13	10.4	17.8
2012-10-24	10.9	10.1	12.2
2012-10-25	10	7.9	13.2
2012-10-26	4.3	-0.4	8
2012-10-27	1.9	-2.9	7.5
2012-10-28	3	-4.8	9.2
2012-10-29	6.2	3.9	7.7
2012-10-30	6.7	4.2	9.1
2012-10-31	7.4	3.4	12.8
2012-11-01	7	4.5	10
2012-11-02	6.4	4.1	9.7
2012-11-03	5.6	3.7	7.9
2012-11-04	6.1	1.6	8.9
2012-11-05	5	-0.4	9
2012-11-06	5.2	-2	10.1
2012-11-07	9.7	8.7	10.7
2012-11-08	9.2	8.4	10.4
2012-11-09	8.7	7.1	10.3
2012-11-10	9.8	7.3	11.6
2012-11-11	7.7	4.4	11.2
2012-11-12	6.5	4.5	8.3
2012-11-13	7.5	6.1	8.6
2012-11-14	7.1	1.4	12.5
2012-11-15	3.6	1.7	5.4
2012-11-16	3	0.4	4.4
2012-11-17	4.8	0.8	7.7
2012-11-18	4.8	-1.9	8.7
2012-11-19	5.1	-1.9	9.8
2012-11-20	7.9	3.8	11.3
2012-11-21	6	2.9	9.7
2012-11-22	7.5	5.2	11.2
2012-11-23	6.4	5	8
2012-11-24	6.4	1.5	8.8
2012-11-25	10.1	7.1	13
2012-11-26	6.9	4.3	8.8
2012-11-27	6.7	4.9	9
2012-11-28	4.9	2.2	8
2012-11-29	2.9	-0.7	6
2012-11-30	0.7	-3.1	4.8
2012-12-01	2.8	1.1	4.3
2012-12-02	1.9	-2.6	5.3
2012-12-03	1.7	-0.4	5.4
2012-12-04	2.4	-1.2	5.4
2012-12-05	0.4	-2	3.3
2012-12-06	-1	-5.9	3.7
2012-12-07	-0.6	-4.5	0.8
2012-12-08	-5.4	-12.8	0.4
2012-12-09	3.3	0.4	7
2012-12-10	2.3	-1.2	5.1
2012-12-11	-0.5	-2.9	1.8
2012-12-12	-0.1	-2	1.9
2012-12-13	-1.8	-3.1	-0.4
2012-12-14	4	-0.5	9.1
2012-12-15	8.1	7.2	9.2
2012-12-16	6.8	4.8	7.8
2012-12-17	6.2	4.3	7.3
2012-12-18	4.9	3.5	5.8
2012-12-19	4.8	3.6	5.7
2012-12-20	2.5	1.3	4.1
2012-12-21	3.4	1.8	6.3
2012-12-22	6.7	6.1	7.5
2012-12-23	11	7.5	12.8
2012-12-24	9.6	7.1	12.1
2012-12-25	8.2	6.3	9.8
2012-12-26	7.1	5	8.8
2012-12-27	7	4	9.1
2012-12-28	5.2	0.2	9.5
2012-12-29	10.2	8.3	11.3
2012-12-30	7.3	5.1	8.7
2012-12-31	8.8	7.8	9.8
2013-01-01	5.7	2	8.3
2013-01-02	5.5	1.9	8
2013-01-03	9.4	6.6	10.7
2013-01-04	8.9	7.8	9.7
2013-01-05	7.4	6.7	8.4
2013-01-06	7.8	6.6	9
2013-01-07	6.9	5.8	8
2013-01-08	6.6	5.5	7.9
2013-01-09	5.7	4.2	6.7
2013-01-10	4.2	-1	7.1
2013-01-11	-0.2	-3.4	2.5
2013-01-12	-0.6	-3.4	2
2013-01-13	-2.7	-5.7	0
2013-01-14	-3.5	-5.5	-1.5
2013-01-15	-3.6	-5.1	-2.7
2013-01-16	-7.3	-14.1	-4.9
2013-01-17	-4.5	-7	-2.6
2013-01-18	-2	-3.1	-0.7
2013-01-19	-4.5	-5.9	-3.1
2013-01-20	-5	-6.3	-3
2013-01-21	-2.9	-3.4	-2
2013-01-22	-4.9	-9.3	-2.2
2013-01-23	-5	-9.1	-3.5
2013-01-24	-3.7	-8.2	-0.4
2013-01-25	-4.7	-10.7	-2.8
2013-01-26	-1.9	-4.4	1.1
2013-01-27	2.9	1.1	4.8
2013-01-28	4.1	1	6.6
2013-01-29	10.2	6.6	12.4
2013-01-30	9.9	6.9	13.1
2013-01-31	6.8	5.6	8.9
2013-02-01	4.6	1.9	6.7
2013-02-02	3	0.5	5.6
2013-02-03	3.7	0.6	6.5
2013-02-04	7.4	5.7	9.6
2013-02-05	2.8	0.4	6.1
2013-02-06	0.9	-1.6	3.7
2013-02-07	0.8	-2.2	3.5
2013-02-08	0	-3.3	2.2
2013-02-09	-2	-7.1	1.5
2013-02-10	-1.1	-3.3	0.9
2013-02-11	-2	-3.9	0.4
2013-02-12	-0.9	-3	0.3
2013-02-13	-2.1	-7.6	2.9
2013-02-14	-1.3	-3.8	0.4
2013-02-15	2.1	0.3	4.1
2013-02-16	3.6	1.9	6.4
2013-02-17	2.2	-1.3	6.4
2013-02-18	2.3	-0.8	6.9
2013-02-19	2	-0.3	4.3
2013-02-20	-1.1	-3.8	2
2013-02-21	-1.6	-4.8	1.8
2013-02-22	-2.9	-5.2	0.2
2013-02-23	-2	-5.6	0.6
2013-02-24	-0.2	-1.4	0.7
2013-02-25	1.1	0.4	1.6
2013-02-26	2.2	0.4	4.5
2013-02-27	0.7	0	1.6
2013-02-28	1.7	-0.8	4.8
2013-03-01	2.9	1.8	4.5
2013-03-02	2.3	1	4.2
2013-03-03	2.4	-3	5.9
2013-03-04	4.5	-1.7	10.9
2013-03-05	8.3	1.9	16.1
2013-03-06	11.4	4.3	18.6
2013-03-07	8	5.9	10.2
2013-03-08	8.1	5	12.3
2013-03-09	4.3	1.8	5.9
2013-03-10	-0.8	-2.7	1.8
2013-03-11	-2.8	-3.6	-1.9
2013-03-12	-4.1	-9.6	-0.3
2013-03-13	-3.7	-11	3.4
2013-03-14	-2	-7.3	3
2013-03-15	-0.9	-8.6	2.8
2013-03-16	4.7	1.6	7.7
2013-03-17	4.6	0.6	9.8
2013-03-18	6	3.3	10.5
2013-03-19	2.6	0.6	5.6
2013-03-20	0.7	-0.3	1.9
2013-03-21	0.3	-2.6	4.1
2013-03-22	-0.2	-3.6	3.2
2013-03-23	-1.2	-3.6	1.2
2013-03-24	-1.3	-4.5	3.2
2013-03-25	-0.4	-3.2	4.2
2013-03-26	-0.1	-4.1	4.8
2013-03-27	0.5	-4.6	6
2013-03-28	-0.6	-3.8	3.8
2013-03-29	-1.1	-4.7	2.2
2013-03-30	-0.3	-4.6	4.2
2013-03-31	-1.3	-7.8	3.6
2013-04-01	1.1	-4.1	7.3
2013-04-02	2.5	-3.6	8.3
2013-04-03	2.3	-2.3	7.8
2013-04-04	2.6	0.3	4.7
2013-04-05	3.5	1	7.1
2013-04-06	3.8	-3.6	9
2013-04-07	3.1	-4.3	10.5
2013-04-08	5.3	-0.2	10.8
2013-04-09	5.8	-0.4	10.8
2013-04-10	6.1	-0.6	11.1
2013-04-11	7.5	4.1	10.6
2013-04-12	8.4	4.2	13.6
2013-04-13	9.9	5.9	14.5
2013-04-14	15.5	10.1	20.5
2013-04-15	12.5	5.2	16.5
2013-04-16	12.1	4	17.7
2013-04-17	15.4	8.6	21.2
2013-04-18	12.9	7.7	18.5
2013-04-19	7.4	2.9	10.8
2013-04-20	6	0	12.4
2013-04-21	8.7	1.3	15.2
2013-04-22	8.7	-2.7	15.6
2013-04-23	10	4.8	14.9
2013-04-24	13.6	4.3	21
2013-04-25	15.4	8.6	22.8
2013-04-26	7.8	4.8	11.2
2013-04-27	6.2	0.4	10.9
2013-04-28	5.8	-3	12.3
2013-04-29	6.7	1.2	13.2
2013-04-30	8.8	1.9	15
2013-05-01	10.5	2.7	17.7
2013-05-02	11.5	6.4	17.6
2013-05-03	12.2	4.1	19.1
2013-05-04	10.9	1	17.9
2013-05-05	12.9	4.4	19.7
2013-05-06	16.3	6.7	24.5
2013-05-07	16	8	22.6
2013-05-08	15.9	13.4	22.2
2013-05-09	12.8	6.1	16.9
2013-05-10	11.8	8.7	14.4
2013-05-11	10.2	6.5	13.6
2013-05-12	9.1	6.3	13.4
2013-05-13	10.4	7.4	13.7
2013-05-14	9.5	6.5	13
2013-05-15	11.9	6.6	17.5
2013-05-16	10.5	6.3	13.9
2013-05-17	9.5	8.4	11.3
2013-05-18	8.7	3.5	11.8
2013-05-19	11.2	2.4	16.4
2013-05-20	11.4	9.6	13.3
2013-05-21	10.5	8.5	13.1
2013-05-22	8	1.4	11.6
2013-05-23	4.9	1	8.6
2013-05-24	7.9	1.4	13.7
2013-05-25	8.9	3.5	14.5
2013-05-26	9.3	7.7	12.9
2013-05-27	13.6	7.4	19.6
2013-05-28	16	9.8	21.8
2013-05-29	10.8	10.1	11.9
2013-05-30	12.9	10	16.8
2013-05-31	15.9	11.6	22.4
2013-06-01	10.5	6	11.8
2013-06-02	11.3	2.6	17.6
2013-06-03	10.3	3.1	16.1
2013-06-04	14.9	6.1	22.8
2013-06-05	17.1	7.8	23.9
2013-06-06	18.5	10.3	25.8
2013-06-07	18.9	11.1	26.2
2013-06-08	15.1	9.7	22.4
2013-06-09	12.7	8	18.8
2013-06-10	11.9	4.8	18.4
2013-06-11	15.2	5.4	21.6
2013-06-12	18.7	16	21.6
2013-06-13	16	13.2	18.4
2013-06-14	14.8	11	18.9
2013-06-15	15.1	9.4	19.5
2013-06-16	14.9	10.6	20.4
2013-06-17	18.9	10.7	24.7
2013-06-18	23.8	14.1	31.8
2013-06-19	22.5	18.2	26.4
2013-06-20	19.6	16.8	23.4
2013-06-21	16.5	14.8	19.2
2013-06-22	16.1	13	20.5
2013-06-23	14.2	12.2	18.3
2013-06-24	13.3	11.6	16.5
2013-06-25	12.5	5.5	17.5
2013-06-26	12.3	3.7	18
2013-06-27	12.4	10.4	15.2
2013-06-28	13	10	15.9
2013-06-29	14.1	7.7	17.8
2013-06-30	15.2	6.5	21.6
2013-07-01	15.3	8	19.6
2013-07-02	16.1	7.6	21.2
2013-07-03	16.7	14.4	19.7
2013-07-04	17.8	15	22.6
2013-07-05	17.7	13.1	22.8
2013-07-06	19.3	12.5	25.9
2013-07-07	20.5	13.5	26.9
2013-07-08	19.8	13.7	26.3
2013-07-09	18.9	12.2	25.8
2013-07-10	15.8	12.1	20.8
2013-07-11	14.3	10	19.1
2013-07-12	13.8	6.1	19.1
2013-07-13	15.7	7.2	23
2013-07-14	15.9	9.8	22.8
2013-07-15	19.2	10.3	26.7
2013-07-16	19.7	10.5	27.2
2013-07-17	21.2	14.6	26.5
2013-07-18	22.1	15.6	28.6
2013-07-19	20.3	14.3	26.5
2013-07-20	18	13.6	22.7
2013-07-21	23.2	15.4	30.9
2013-07-22	26.2	16.4	33.4
2013-07-23	24	16.6	33.3
2013-07-24	20.8	14.3	27.3
2013-07-25	22.3	13.5	29.1
2013-07-26	21.7	15.7	26.5
2013-07-27	21.3	17	26.9
2013-07-28	19.4	16.4	22.9
2013-07-29	20.1	15.6	24.9
2013-07-30	17.6	14.8	21
2013-07-31	18.7	16.3	22
2013-08-01	24.8	18.9	30.6
2013-08-02	27.4	19.9	35.1
2013-08-03	20.1	12.4	24.3
2013-08-04	20.4	12.1	26.5
2013-08-05	22.8	14.3	29.4
2013-08-06	18	13.8	22.5
2013-08-07	14.4	13.1	17.1
2013-08-08	16.2	9.9	21.5
2013-08-09	17	9.7	23.2
2013-08-10	15.9	8.3	21.2
2013-08-11	16.4	8.2	21.2
2013-08-12	15.9	10.3	20.8
2013-08-13	13.6	7.5	19.1
2013-08-14	14.1	6.6	20.9
2013-08-15	15.4	7.5	19.7
2013-08-16	19.9	14.1	27.4
2013-08-17	19.2	15.9	22.9
2013-08-18	18.2	13.4	23.4
2013-08-19	15.3	8.8	20.1
2013-08-20	14.6	6.4	20.9
2013-08-21	17.3	11.4	23.2
2013-08-22	18.4	12.1	24
2013-08-23	19.8	12.2	25.4
2013-08-24	18.8	15.7	24.8
2013-08-25	17.8	14.9	23.2
2013-08-26	17.6	12.9	24.1
2013-08-27	17.6	11.4	23.9
2013-08-28	17.6	9.5	24.5
2013-08-29	16.1	8.7	23.9
2013-08-30	16.7	9.1	22.9
2013-08-31	15.5	7.4	21.8
2013-09-01	13.5	6.2	18.2
2013-09-02	16	12.1	19.3
2013-09-03	17.8	11.4	22.5
2013-09-04	20.3	15.1	26.1
2013-09-05	23.2	16.1	30.8
2013-09-06	20.7	13.1	28.9
2013-09-07	16.4	12.4	19.7
2013-09-08	14.2	11.6	18.3
2013-09-09	12.9	10	18.3
2013-09-10	12.5	10.2	16.7
2013-09-11	13.7	10.2	19.5
2013-09-12	13.7	9.5	17.3
2013-09-13	13.9	8.3	18.6
2013-09-14	14.4	9.3	18.1
2013-09-15	12	6.7	16.6
2013-09-16	10.6	6.7	15.5
2013-09-17	10	7.5	14.1
2013-09-18	10.8	7	15.7
2013-09-19	11.7	7.1	15.3
2013-09-20	13.2	7.8	16.4
2013-09-21	12.2	5.2	17.5
2013-09-22	15.8	10.8	20.6
2013-09-23	15.6	11.1	20.3
2013-09-24	14.9	12.1	18.2
2013-09-25	14.9	10.7	18.8
2013-09-26	11.4	4.9	15.4
2013-09-27	9.9	5	16.5
2013-09-28	11.4	5.4	17.1
2013-09-29	11.9	7.8	17.4
2013-09-30	10.4	6.2	16.4
2013-10-01	9.6	4.3	16
2013-10-02	9.8	4.3	15
2013-10-03	11.9	5.5	18.3
2013-10-04	14.8	10.2	19.9
2013-10-05	13.4	8	19
2013-10-06	11.3	6.6	16.4
2013-10-07	11.8	5.7	17.8
2013-10-08	14.4	10.5	17.5
2013-10-09	12.9	7.7	15.8
2013-10-10	8.1	4	13.2
2013-10-11	7.2	5.5	7.9
2013-10-12	7.9	4.4	10.7
2013-10-13	7.9	6.8	9
2013-10-14	10.1	8.5	11.4
2013-10-15	9	5.4	11.4
2013-10-16	9.6	5.6	12.4
2013-10-17	11.7	5	16.6
2013-10-18	10.4	5.1	13.1
2013-10-19	13.1	8.5	16.6
2013-10-20	14.8	12.3	18.4
2013-10-21	14.5	11.7	17.8
2013-10-22	16.9	12.9	22.3
2013-10-23	15.4	12.6	19
2013-10-24	11.2	7.4	16.4
2013-10-25	14.4	9.9	17.9
2013-10-26	16.2	14.8	19.7
2013-10-27	13.9	12.1	15.2
2013-10-28	13.4	10.4	17.1
2013-10-29	9.9	6.9	13.5
2013-10-30	8.3	5.4	12.8
2013-10-31	9.9	6.1	13
2013-11-01	10.8	9.2	13.2
2013-11-02	10.3	8.4	12.4
2013-11-03	8.7	6.6	11.1
2013-11-04	7.7	4.1	12.2
2013-11-05	6.5	4.2	8.7
2013-11-06	9.3	5.4	13.8
2013-11-07	11	8.7	13.7
2013-11-08	8.8	7.1	10.3
2013-11-09	8	5.3	10.4
2013-11-10	4.9	-0.1	9
2013-11-11	5.2	-1.4	10.3
2013-11-12	6.6	4	7.8
2013-11-13	4.4	-0.7	10.9
2013-11-14	5.7	4	7.5
2013-11-15	5.1	1.2	10.4
2013-11-16	4.9	3.9	5.7
2013-11-17	5.8	4.4	7.2
2013-11-18	4.6	3.8	5.8
2013-11-19	4.7	-0.2	8
2013-11-20	1.9	-2.8	5.8
2013-11-21	2.2	0.6	4.1
2013-11-22	3.7	1.1	5.3
2013-11-23	3.5	-2.2	6.4
2013-11-24	4.5	-0.4	7.8
2013-11-25	3.3	-0.8	7
2013-11-26	4.3	0.8	7
2013-11-27	4.6	-0.5	7.4
2013-11-28	7.7	6.2	9.6
2013-11-29	5.7	1.8	8
2013-11-30	4.7	1.1	8.6
2013-12-01	5.3	1.3	8.4
2013-12-02	3	-0.6	7.9
2013-12-03	0.5	-3.2	4.7
2013-12-04	3.3	-0.1	7.3
2013-12-05	2.9	-0.6	7.2
2013-12-06	2.3	0.3	4.2
2013-12-07	4.4	0.7	6.8
2013-12-08	7.4	4.9	8.9
2013-12-09	8.7	7.4	9.9
2013-12-10	5.1	-1.1	9.4
2013-12-11	1.7	-3.6	4.1
2013-12-12	2.9	0.7	5
2013-12-13	1.3	-0.5	4.6
2013-12-14	4.9	1.3	7.5
2013-12-15	7.4	5.7	8.8
2013-12-16	9.5	7.3	12
2013-12-17	6.2	4.5	10.1
2013-12-18	7.6	5.3	9
2013-12-19	6.4	1.9	8.9
2013-12-20	5.1	2.6	7.3
2013-12-21	6.6	5.5	7.6
2013-12-22	7.4	5.4	10
2013-12-23	7.8	4.2	12
2013-12-24	10	6.7	12.4
2013-12-25	6	2	8.4
2013-12-26	4.5	2.4	6.5
2013-12-27	7.1	2.5	9
2013-12-28	6.3	3.6	8.2
2013-12-29	4.5	2.5	7.1
2013-12-30	4.7	1.9	6.7
2013-12-31	6.2	4.3	8.1
2014-01-01	6.6	4.1	8.3
2014-01-02	8.4	5.7	10.5
2014-01-03	8.2	5.2	11.7
2014-01-04	7	4.9	9.1
2014-01-05	5.3	3.4	7.2
2014-01-06	10.6	5.1	13.7
2014-01-07	10.3	8.7	12.4
2014-01-08	8.2	6.4	10.1
2014-01-09	8.8	5.9	11.6
2014-01-10	5.5	3	8.1
2014-01-11	3.5	0.5	6.7
2014-01-12	1.4	-1.9	5.4
2014-01-13	5.5	1.4	9.1
2014-01-14	4.5	0.8	7.6
2014-01-15	3.8	1.5	5.5
2014-01-16	6.7	5.5	7.9
2014-01-17	7.3	6.2	9.1
2014-01-18	6.9	4.7	8.9
2014-01-19	5.4	3.2	7.3
2014-01-20	2.5	1	5.4
2014-01-21	2.7	1	4.3
2014-01-22	2.6	-0.1	4.6
2014-01-23	1.5	-1.1	4.4
2014-01-24	2.5	0.2	5.2
2014-01-25	2.9	0.6	5
2014-01-26	4.6	1.8	6.3
2014-01-27	3.5	1.9	5
2014-01-28	4	1.8	6.8
2014-01-29	-0.6	-2.3	1.8
2014-01-30	0.3	-2.8	4.1
2014-01-31	2.6	-3.5	6.6
2014-02-01	5.7	4.1	7.7
2014-02-02	4.6	1.7	8.2
2014-02-03	3.8	0.1	8.2
2014-02-04	5.3	2.4	9
2014-02-05	6.7	3.3	9.8
2014-02-06	7.5	5.7	9.6
2014-02-07	7.2	3.6	10
2014-02-08	6.5	3.7	8.4
2014-02-09	5.5	3.5	7.2
2014-02-10	3.9	1	7.7
2014-02-11	5.4	1.5	8.4
2014-02-12	5.3	2.4	8.8
2014-02-13	4.3	1.4	6.9
2014-02-14	4.7	1.5	8
2014-02-15	9.5	6.5	12.7
2014-02-16	5.4	-0.7	9.5
2014-02-17	5.4	1.6	9.3
2014-02-18	5.8	3.5	8
2014-02-19	7.1	5.6	10
2014-02-20	7.9	5.1	9.4
2014-02-21	6.5	3.8	9
2014-02-22	5.7	3.7	8.5
2014-02-23	6.7	2.8	10.9
2014-02-24	7.8	2.8	12.8
2014-02-25	8.8	5.8	11.6
2014-02-26	6.9	3	11
2014-02-27	4.9	1.7	9.8
2014-02-28	5.4	2.5	8.7
2014-03-01	5.4	2.2	8.3
2014-03-02	5.7	1.5	9.4
2014-03-03	4.9	1.3	7.8
2014-03-04	5.5	-0.9	11
2014-03-05	4.2	-1.4	11.9
2014-03-06	6.5	-1	13.4
2014-03-07	7.9	1.3	12.8
2014-03-08	9.3	-0.9	15.7
2014-03-09	12.3	4.4	19.6
2014-03-10	10.9	0.7	20
2014-03-11	9.1	5.8	13.6
2014-03-12	8.3	2.4	16.8
2014-03-13	7.8	-0.9	17.7
2014-03-14	5.3	-2.5	13
2014-03-15	9.2	7.3	11.5
2014-03-16	10	6.5	12.4
2014-03-17	9.5	5.7	11.9
2014-03-18	8.4	6.3	10
2014-03-19	11	7.4	16.2
2014-03-20	13.4	6.4	22.1
2014-03-21	7.3	2.4	11.5
2014-03-22	5.8	2.5	9.6
2014-03-23	3.5	-2	8.2
2014-03-24	4	-1.9	10
2014-03-25	4.7	-2.8	11.4
2014-03-26	4	-3.2	9.9
2014-03-27	8.4	2.5	13.8
2014-03-28	10.2	4	17.2
2014-03-29	11.8	4.5	19.3
2014-03-30	13.6	5.4	20.4
2014-03-31	14.5	8.4	20.1
2014-04-01	13.4	6.6	20.2
2014-04-02	14	5.4	21.8
2014-04-03	15	8.1	23
2014-04-04	12.7	10	15.6
2014-04-05	11.2	4.6	17.4
2014-04-06	13.1	6.2	18.1
2014-04-07	16.2	12.7	21.8
2014-04-08	8.1	3.1	13.4
2014-04-09	9.2	2.5	14.5
2014-04-10	11.2	8.1	15
2014-04-11	10.5	2.7	15.5
2014-04-12	8.4	-0.5	15.1
2014-04-13	9.7	5.1	14.5
2014-04-14	8.1	2.8	11.5
2014-04-15	5.5	-0.4	10.8
2014-04-16	7.2	-2.9	14.9
2014-04-17	10.9	4.6	17.7
2014-04-18	7.6	3.4	13.1
2014-04-19	11	5.5	17.1
2014-04-20	15.5	9.7	21.7
2014-04-21	11.7	9.2	13.8
2014-04-22	12.9	7.9	18.1
2014-04-23	13.7	5	20.9
2014-04-24	14.5	8.1	22.3
2014-04-25	16.8	11.4	23.9
2014-04-26	14.1	10.2	18.6
2014-04-27	11.4	9.9	15
2014-04-28	12.9	9.3	16.9
2014-04-29	13.3	10.2	16.2
2014-04-30	13.1	10.8	18.7
2014-05-01	12.5	10	17.6
2014-05-02	9	5.6	11.7
2014-05-03	8.3	1.3	13.8
2014-05-04	6.8	-1	13
2014-05-05	12.5	4.3	18.6
2014-05-06	14.3	10.8	18.1
2014-05-07	12.2	9.8	16.2
2014-05-08	11.4	10.3	13
2014-05-09	11.8	7.7	15.6
2014-05-10	10.8	8.6	13.8
2014-05-11	9.6	8.4	11.2
2014-05-12	9.8	7.2	13.3
2014-05-13	9.6	3.8	14.8
2014-05-14	8.4	2.2	13.8
2014-05-15	8.3	0.1	14
2014-05-16	12	1.8	19.1
2014-05-17	13	4.8	20.5
2014-05-18	16.2	7.3	23.1
2014-05-19	18.9	11.3	24.6
2014-05-20	20.7	14.7	26.8
2014-05-21	18.4	12.8	21.3
2014-05-22	18.2	13.7	22.1
2014-05-23	15.9	13	20.4
2014-05-24	15.3	9.1	19.4
2014-05-25	15.9	9.2	21.4
2014-05-26	15.6	13.1	22
2014-05-27	15.3	14.1	17.1
2014-05-28	12.5	10.8	14.6
2014-05-29	9.7	5.7	11.5
2014-05-30	11.6	4.8	17
2014-05-31	13.2	5.2	20
2014-06-01	12.4	5.4	18.9
2014-06-02	14.8	6.2	21
2014-06-03	15.8	7	22
2014-06-04	14.9	10.9	19.5
2014-06-05	12.2	8.4	17.2
2014-06-06	16.7	7.8	22.9
2014-06-07	21.5	12.7	29.2
2014-06-08	20.6	16.2	25.8
2014-06-09	21.4	16.6	26.4
2014-06-10	20.8	16.8	25.9
2014-06-11	17.5	9.5	23
2014-06-12	16.3	7.3	22.8
2014-06-13	16.5	8	22.2
2014-06-14	15.3	11.4	20.2
2014-06-15	14.8	7.9	20.8
2014-06-16	13.7	8.1	17.6
2014-06-17	15.5	9.7	20.2
2014-06-18	14	5.2	20.2
2014-06-19	13.9	12.1	15.6
2014-06-20	13.7	9.3	17.9
2014-06-21	14.9	6.6	20.3
2014-06-22	13.8	7.1	20.1
2014-06-23	14.4	5	21.4
2014-06-24	15.3	9	21.4
2014-06-25	14	6.7	19.9
2014-06-26	16.7	10.3	21.9
2014-06-27	16.8	12.3	21.8
2014-06-28	16	13.2	19.7
2014-06-29	15.1	10.8	19.8
2014-06-30	13	6.2	18.2
2014-07-01	12.6	3.9	19.2
2014-07-02	14.2	4.7	21.7
2014-07-03	17.9	7.8	25.5
2014-07-04	21.4	10.1	29.3
2014-07-05	19.7	17.8	22.1
2014-07-06	19.5	14.1	25.8
2014-07-07	17.3	12.1	22.7
2014-07-08	14.7	12.5	16.5
2014-07-09	15.7	12.3	18.4
2014-07-10	21.4	15.7	28.1
2014-07-11	19.8	16.5	24.4
2014-07-12	19.6	16.4	24.6
2014-07-13	18.7	15.5	22.4
2014-07-14	18.2	12.8	24
2014-07-15	16.5	12.2	21.2
2014-07-16	19.2	11.5	25.9
2014-07-17	21.6	13.6	28
2014-07-18	25.3	17.3	31.9
2014-07-19	27.1	18.2	33.6
2014-07-20	22.3	19.4	27.6
2014-07-21	19.3	18.4	21.5
2014-07-22	22	18.2	27.5
2014-07-23	22.7	18.1	28.6
2014-07-24	21.3	16.5	26.8
2014-07-25	17.7	16.2	20.4
2014-07-26	19.1	15.4	23.2
2014-07-27	20.7	14.9	26
2014-07-28	18.5	14.8	24.3
2014-07-29	21.5	14.9	27.8
2014-07-30	18.4	11.9	23.5
2014-07-31	17.9	9.7	24.4
2014-08-01	19.9	12	26.3
2014-08-02	21	16.4	28.2
2014-08-03	19.9	15.3	25.2
2014-08-04	18.5	12.8	23.5
2014-08-05	17	9.8	23.3
2014-08-06	17.7	11.9	22.8
2014-08-07	17.8	13.7	22.4
2014-08-08	19.1	13.7	24.6
2014-08-09	19	15.1	22.8
2014-08-10	18.3	14.7	24
2014-08-11	16.4	13.6	20.5
2014-08-12	15.4	12.7	19.8
2014-08-13	16	11.3	21.1
2014-08-14	15.3	13	19.4
2014-08-15	14.5	10.9	19.8
2014-08-16	14.8	9.4	18.2
2014-08-17	14.2	11.9	15.9
2014-08-18	13.3	9.4	17.1
2014-08-19	11.6	8.5	16.6
2014-08-20	11.9	7.8	17.6
2014-08-21	12.6	6.3	17.4
2014-08-22	12.7	9.2	16.9
2014-08-23	11.7	7.4	17.3
2014-08-24	11.3	5.8	17
2014-08-25	12.5	6.1	17.7
2014-08-26	13.1	9.6	16.4
2014-08-27	14.7	6.2	21.2
2014-08-28	17.3	11.7	21.8
2014-08-29	16.5	12.9	21
2014-08-30	15.2	11.9	17.6
2014-08-31	14	9.1	18.2
2014-09-01	14.2	7.8	20.6
2014-09-02	15.1	8.6	20.1
2014-09-03	16	11	20.5
2014-09-04	17.9	12.3	23.7
2014-09-05	17.9	12.9	22.7
2014-09-06	16.5	12.1	21.5
2014-09-07	16.2	10.9	21.4
2014-09-08	13.5	8	20.1
2014-09-09	13.5	7.8	17.6
2014-09-10	13.9	10	17.5
2014-09-11	15.1	10.5	20.8
2014-09-12	15.4	7.2	21.5
2014-09-13	16.6	13.5	21.8
2014-09-14	15.6	10.4	20.7
2014-09-15	17	11.6	21.3
2014-09-16	19.3	15.4	24.5
2014-09-17	18.9	14.4	25.1
2014-09-18	19.6	14.3	25.1
2014-09-19	17.6	13.3	22.6
2014-09-20	17	12.3	23.3
2014-09-21	14.8	10.5	18.7
2014-09-22	11.9	6.1	16.8
2014-09-23	12.3	4.8	17.7
2014-09-24	12.1	9.4	15.4
2014-09-25	12.8	7.2	17.4
2014-09-26	14.4	9.7	18.1
2014-09-27	13.5	6.8	20.7
2014-09-28	15.4	9.1	21.3
2014-09-29	16.4	13.5	19.6
2014-09-30	15.8	11.2	19.9
2014-10-01	15.6	10.1	20.1
2014-10-02	16.1	13.2	20.3
2014-10-03	15.9	10.5	22.5
2014-10-04	15.9	11.6	21.2
2014-10-05	12.3	11.5	12.9
2014-10-06	14.1	12.3	16.4
2014-10-07	12	8.6	15.9
2014-10-08	12.8	7.8	15.8
2014-10-09	14.7	12.4	17.4
2014-10-10	13.5	9.3	17.4
2014-10-11	11.9	7.3	15.9
2014-10-12	12.1	7.8	16.4
2014-10-13	14.8	11.5	18.8
2014-10-14	12.4	10.2	14.7
2014-10-15	13	11.1	16.7
2014-10-16	13.6	11.5	17
2014-10-17	13.9	11	18
2014-10-18	16.5	11.8	22.2
2014-10-19	16.9	14.6	22
2014-10-20	13.9	12	16.9
2014-10-21	10.6	7.2	12.7
2014-10-22	9	5.9	11.9
2014-10-23	11.3	7.6	14.2
2014-10-24	11.2	10.3	12.1
2014-10-25	11.9	8.4	14.7
2014-10-26	12.2	8.2	15.4
2014-10-27	12.2	9.2	16.7
2014-10-28	9.1	6.7	13.3
2014-10-29	9.9	8.1	11.1
2014-10-30	12.3	10.5	14.2
2014-10-31	13.4	10.6	16.6
2014-11-01	13.9	11.1	18.5
2014-11-02	14.8	12.5	17.5
2014-11-03	12.3	9.6	15
2014-11-04	8.8	6.1	10.7
2014-11-05	6.6	2.7	10.5
2014-11-06	5.3	1.6	8.3
2014-11-07	7.1	3.6	9.9
2014-11-08	9.7	7.8	12.9
2014-11-09	9.3	6.9	13.3
2014-11-10	9.3	5.9	12.4
2014-11-11	9.1	5.5	11.9
2014-11-12	9.1	5.1	11.6
2014-11-13	8	2.7	13.2
2014-11-14	10.1	7.1	12.4
2014-11-15	9.6	8.4	11
2014-11-16	8.2	7.7	8.8
2014-11-17	9.2	7.6	12.3
2014-11-18	7.4	6.7	8.2
2014-11-19	7.2	6.6	7.9
2014-11-20	6.8	3.9	7.7
2014-11-21	4.8	1.5	8.8
2014-11-22	7.5	3.2	12.2
2014-11-23	10.6	7.8	13.8
2014-11-24	5.8	-0.1	10.6
2014-11-25	4	-1.6	8.5
2014-11-26	4.4	2.3	5.8
2014-11-27	6.7	5.5	8.3
2014-11-28	5.1	1.6	7.8
2014-11-29	2	0.5	3.1
2014-11-30	1.8	1.3	2.7
2014-12-01	0.8	0.1	1.3
2014-12-02	0.2	-0.4	1.3
2014-12-03	-2	-3.5	0.3
2014-12-04	-0.6	-2.9	1
2014-12-05	3	0.8	4.7
2014-12-06	3.5	-2	8
2014-12-07	2.7	-1.7	5.6
2014-12-08	1.8	-0.6	4.1
2014-12-09	1.2	-2.3	4.2
2014-12-10	5.2	3.4	8.8
2014-12-11	5.1	3.3	6.2
2014-12-12	6.8	2.4	8.8
2014-12-13	3.8	1.9	5.3
2014-12-14	2.4	0.7	3.6
2014-12-15	4.9	2.7	6.5
2014-12-16	4.5	0.5	7.1
2014-12-17	7	3	9.9
2014-12-18	11.1	9.5	12.4
2014-12-19	8.3	4.6	11.5
2014-12-20	6	2	8.1
2014-12-21	6.7	3.3	9.5
2014-12-22	10.3	8.7	11.9
2014-12-23	10.6	8.8	12.1
2014-12-24	6.9	2.8	9.2
2014-12-25	3.2	-1.6	6.3
2014-12-26	1.3	-3.3	4.4
2014-12-27	0.2	-3.2	2.7
2014-12-28	-3.1	-6.2	1.2
2014-12-29	1.1	-1	3.8
2014-12-30	2.2	1	3.2
2014-12-31	2.8	-0.2	6.7
2015-01-01	2.3	-0.3	3.8
2015-01-02	5.7	2.6	8.5
2015-01-03	2.6	0.4	4
2015-01-04	1.2	-1.8	6.6
2015-01-05	1.5	-1	3.2
2015-01-06	2.4	0.2	4
2015-01-07	3.2	0.1	7.1
2015-01-08	5.6	3	7.5
2015-01-09	8.8	4.8	12.8
2015-01-10	9	3.1	12.8
2015-01-11	5	2.5	6.7
2015-01-12	7.6	5.8	9.2
2015-01-13	8.1	5.4	10.5
2015-01-14	3.7	1.8	5.4
2015-01-15	7.7	4.4	10
2015-01-16	4.9	1.6	7.8
2015-01-17	1.7	-2.5	5.4
2015-01-18	1.5	0.3	2.3
2015-01-19	0.4	0	1.2
2015-01-20	-0.1	-2	3
2015-01-21	-0.7	-2.8	1.5
2015-01-22	-1.6	-3	-0.1
2015-01-23	-2.3	-4.4	-1.1
2015-01-24	-0.4	-5.5	5.4
2015-01-25	1	-5.9	3.2
2015-01-26	4.2	2.1	7.4
2015-01-27	3.1	-0.1	6.2
2015-01-28	4	1.9	6.1
2015-01-29	1.1	0.2	3.5
2015-01-30	0.5	-1.5	2.4
2015-01-31	0.5	-1.9	3.2
2015-02-01	1.3	-1.4	5
2015-02-02	0.8	-1.2	4.3
2015-02-03	0.9	-3.1	5.1
2015-02-04	-1.2	-5.4	4.4
2015-02-05	-1.2	-4.5	1.4
2015-02-06	-1	-3	2.2
2015-02-07	0.2	-6.7	4.3
2015-02-08	4.1	2	5.9
2015-02-09	5.2	2.8	6.7
2015-02-10	5.2	4.3	7
2015-02-11	2.9	-2.3	4.6
2015-02-12	0.4	-3.1	4
2015-02-13	3.6	-1.4	8.7
2015-02-14	6.4	3.4	11
2015-02-15	1.8	-2.3	5.4
2015-02-16	1.3	-4.4	7.7
2015-02-17	2.2	-3.9	7.6
2015-02-18	0.4	-4	4.6
2015-02-19	3	0.4	6.7
2015-02-20	4.8	3	5.9
2015-02-21	2.2	-1.1	5.6
2015-02-22	1.6	-1.8	4
2015-02-23	4.7	1.5	9.4
2015-02-24	4.6	2.5	8.4
2015-02-25	4	-0.4	9
2015-02-26	5.9	3.2	8.9
2015-02-27	3.7	-2.3	8.1
2015-02-28	4.1	-2.3	8.9
2015-03-01	7.6	4.6	11.5
2015-03-02	4.2	0.8	8.7
2015-03-03	2.7	-0.2	6.7
2015-03-04	3.4	0.5	7.1
2015-03-05	3.5	-1.3	9.3
2015-03-06	5.4	2.9	8.4
2015-03-07	8.1	3.1	13.9
2015-03-08	9.4	4.3	16.7
2015-03-09	8.1	5.8	10.9
2015-03-10	6.8	-2.4	11.9
2015-03-11	1.3	-4.8	9.4
2015-03-12	5.7	-3.6	12.4
2015-03-13	4.2	-0.4	8.3
2015-03-14	2.9	-0.3	4.8
2015-03-15	5.1	4	6.9
2015-03-16	6.3	1.4	13.1
2015-03-17	8.4	-0.3	17.5
2015-03-18	6	-1.2	14.4
2015-03-19	5.8	-1.8	11.3
2015-03-20	2.1	-2.7	8.4
2015-03-21	5.7	3.4	9.3
2015-03-22	3.3	-2.2	7.8
2015-03-23	3.2	-3.7	10.4
2015-03-24	4.5	-4	11.1
2015-03-25	5.1	4.3	6.5
2015-03-26	4.7	1.1	7.1
2015-03-27	5	-1.6	8.9
2015-03-28	6.6	-1.6	10.8
2015-03-29	8.9	6.7	11.1
2015-03-30	6.6	4.3	9.1
2015-03-31	8.1	4.7	10.8
2015-04-01	5.4	2.6	8.7
2015-04-02	5.1	3.4	8.6
2015-04-03	6.3	2.4	10.2
2015-04-04	4.9	-0.6	9.5
2015-04-05	3.9	-4.8	11.6
2015-04-06	5.4	-0.6	11.9
2015-04-07	6.7	-2.1	13.3
2015-04-08	9	4.6	14.5
2015-04-09	10.6	4.2	18.3
2015-04-10	11.6	2	20.5
2015-04-11	9	1.4	14.2
2015-04-12	10.1	2.1	15.2
2015-04-13	7.5	2.4	13
2015-04-14	11.5	3.2	19.9
2015-04-15	13.6	4.8	22.9
2015-04-16	9.1	4.3	14.3
2015-04-17	8.2	3.6	13.3
2015-04-18	8.7	2.7	15
2015-04-19	6.7	-2.3	15.1
2015-04-20	11.2	2.5	18.5
2015-04-21	9.5	-0.6	19.4
2015-04-22	7.7	-0.3	15.6
2015-04-23	8.3	0.1	16.9
2015-04-24	12	0.8	20.6
2015-04-25	11.4	6.6	15.2
2015-04-26	11	7.8	14.8
2015-04-27	7.8	-1.1	13.2
2015-04-28	4.7	-4.1	12.4
2015-04-29	8.8	0.6	14.2
2015-04-30	8.6	1.2	13.9
2015-05-01	7.5	-1	14.2
2015-05-02	9.5	-0.9	16
2015-05-03	12.7	6.1	17
2015-05-04	15.2	10.9	20.1
2015-05-05	15.5	9.6	22.7
2015-05-06	11.6	9.3	15.9
2015-05-07	10.9	6.8	16.2
2015-05-08	13.9	6.8	19
2015-05-09	13.4	8.1	16.3
2015-05-10	12.6	4.2	18.8
2015-05-11	17.9	10.3	25.8
2015-05-12	14	7.3	19
2015-05-13	11.4	4.1	18.3
2015-05-14	10.7	4.1	16.2
2015-05-15	9.2	2.7	16
2015-05-16	8.8	2.5	14.4
2015-05-17	10.7	3.3	16.9
2015-05-18	11.1	5.1	15.9
2015-05-19	9.5	6.3	13.2
2015-05-20	9.8	5.1	15
2015-05-21	11.4	1.3	17.9
2015-05-22	14.5	7.8	19.8
2015-05-23	12	4.3	16.1
2015-05-24	13	3.6	20
2015-05-25	12.1	7.9	16.2
2015-05-26	10.7	6.7	14.3
2015-05-27	12.4	3.4	18.8
2015-05-28	12.1	4.1	16.7
2015-05-29	10.9	4.4	16.7
2015-05-30	10.2	4.7	15.7
2015-05-31	12.6	7.1	17.8
2015-06-01	12.4	7	16.7
2015-06-02	14.8	11.3	18.6
2015-06-03	13.8	6.1	18.7
2015-06-04	15.5	4.4	21.8
2015-06-05	22.5	13.5	31.8
2015-06-06	15.3	6	20
2015-06-07	13.2	5.1	20.2
2015-06-08	11.6	4	17.9
2015-06-09	11.3	5.4	16.3
2015-06-10	15.7	8.4	21.9
2015-06-11	17.8	9.4	24.8
2015-06-12	21.3	12	28.1
2015-06-13	18.1	14.8	22.7
2015-06-14	15.2	11.6	20.1
2015-06-15	13.4	7.2	19.1
2015-06-16	10.6	2.5	16.6
2015-06-17	15.7	4	23.1
2015-06-18	14.6	10.6	17.5
2015-06-19	12.3	9.9	16.4
2015-06-20	12.3	8.8	15.6
2015-06-21	14.1	10.8	19.3
2015-06-22	12	7.5	14.6
2015-06-23	11.2	7	13.4
2015-06-24	14.6	10.3	20.9
2015-06-25	17.8	10.2	24.2
2015-06-26	20.1	13.4	24.8
2015-06-27	17.4	9.4	22.5
2015-06-28	16.8	7.3	22.2
2015-06-29	18.3	11.3	24.6
2015-06-30	20.4	9.2	27.1
2015-07-01	26	16.4	33.9
2015-07-02	26.1	18.5	36.2
2015-07-03	24.3	17.7	30.3
2015-07-04	26.2	18.7	33.7
2015-07-05	20.8	14.7	28.1
2015-07-06	18.4	13.1	23.8
2015-07-07	20.7	14.3	27.6
2015-07-08	15.3	12.1	18.9
2015-07-09	12.8	5.6	17.9
2015-07-10	15.9	4.6	22.6
2015-07-11	20.8	14	28.8
2015-07-12	16.9	13.9	19
2015-07-13	16.7	15.4	18.7
2015-07-14	17.9	12.9	21.9
2015-07-15	17.4	11.5	21.8
2015-07-16	19.8	14	25.2
2015-07-17	22.1	17.2	26.7
2015-07-18	18.1	14.5	22.5
2015-07-19	15.5	11.4	19.7
2015-07-20	17.4	8.4	21.6
2015-07-21	20.6	15.7	25.1
2015-07-22	18.8	14.4	23.7
2015-07-23	17.5	12.1	22.4
2015-07-24	18.6	14.1	24.6
2015-07-25	14.2	9.2	18.7
2015-07-26	14.3	7.7	21
2015-07-27	15.8	13.3	19.2
2015-07-28	15	12.2	19.3
2015-07-29	13.3	9.7	18.1
2015-07-30	12.4	6.2	17.8
2015-07-31	12.7	4	19.2
2015-08-01	15.8	8.7	22.5
2015-08-02	17.8	6.6	24.5
2015-08-03	23.6	16.2	31.9
2015-08-04	17	10.9	20.7
2015-08-05	18.9	10	25.6
2015-08-06	21.8	14.8	29.9
2015-08-07	20.9	12.8	28.4
2015-08-08	18.8	13.4	23.9
2015-08-09	18.2	12	24.1
2015-08-10	19.3	14.7	25
2015-08-11	19.5	13.1	25.4
2015-08-12	19.6	15.9	24
2015-08-13	22	14.3	28.4
2015-08-14	21.1	16.2	26.2
2015-08-15	18.5	15.5	23.2
2015-08-16	14.5	12.8	15.9
2015-08-17	14	12.9	14.9
2015-08-18	14.2	11.6	17.6
2015-08-19	16.6	12.1	21.4
2015-08-20	18.5	10.7	25
2015-08-21	20.2	12.4	25.8
2015-08-22	21	15.3	26.9
2015-08-23	20	14.9	26
2015-08-24	18.4	15.3	23.3
2015-08-25	16	13.7	19.8
2015-08-26	20.3	16	25.4
2015-08-27	15.5	13.5	18.9
2015-08-28	15.3	10.6	20.6
2015-08-29	17.3	8.4	24
2015-08-30	20.2	14.2	26.3
2015-08-31	21.3	16.3	28.2
2015-09-01	15	9.6	18.6
2015-09-02	13	9	18.6
2015-09-03	11.6	6.2	16.9
2015-09-04	12.9	9.8	17.6
2015-09-05	12.5	9.5	17.2
2015-09-06	12.1	7	16.6
2015-09-07	14.2	11.9	18.1
2015-09-08	13.5	8.3	16.5
2015-09-09	12.9	7.6	18.4
2015-09-10	13.7	8.5	19.6
2015-09-11	13.9	8.6	19.8
2015-09-12	15.8	11.5	21.2
2015-09-13	16.5	13.2	19.2
2015-09-14	14.3	10.8	19.1
2015-09-15	12.6	9.3	18.6
2015-09-16	15	11.2	17.8
2015-09-17	14.3	11.4	16.2
2015-09-18	13.3	9.3	18.7
2015-09-19	13.2	9.6	17.8
2015-09-20	12.6	7.1	17.3
2015-09-21	13.5	9.1	17.7
2015-09-22	12.5	10.1	16.3
2015-09-23	12.6	9.1	17.9
2015-09-24	12.3	10	15.7
2015-09-25	11.5	4.8	16.3
2015-09-26	10.5	2.2	17.8
2015-09-27	11.3	7.2	17.7
2015-09-28	11.8	7.4	16.6
2015-09-29	11.3	6.6	17.3
2015-09-30	11.8	6.8	17.7
2015-10-01	10.8	6.1	17.1
2015-10-02	10.8	4	18.3
2015-10-03	11.4	6.2	17.5
2015-10-04	11.2	4	17.8
2015-10-05	13.4	8.1	17.5
2015-10-06	15	12.7	17.8
2015-10-07	14.5	12.9	17.1
2015-10-08	12.8	8.6	15.1
2015-10-09	11.1	4.2	17.2
2015-10-10	10.1	5.2	14.3
2015-10-11	6	2.1	11
2015-10-12	4.2	0.3	9.5
2015-10-13	2.8	-0.4	4.9
2015-10-14	3.8	2.2	5.2
2015-10-15	5.9	2.4	7.4
2015-10-16	6.9	6.3	7.7
2015-10-17	7.5	6.7	9
2015-10-18	6.5	2.1	8.6
2015-10-19	9.3	4.7	11.7
2015-10-20	7.8	2.9	12
2015-10-21	9.1	4.1	12.1
2015-10-22	11.2	9.1	14.1
2015-10-23	10.8	6.9	13.9
2015-10-24	11	9.9	13
2015-10-25	9.9	5.5	13.8
2015-10-26	10.8	8	15.3
2015-10-27	11.2	6.9	16.7
2015-10-28	10.1	6.5	12.9
2015-10-29	11	7.8	15.2
2015-10-30	10	5.7	14.8
2015-10-31	9.6	6.3	13.8
2015-11-01	7.9	2.9	16.6
2015-11-02	7.2	1.7	14.9
2015-11-03	9.8	3.7	15.6
2015-11-04	11.9	7.1	16
2015-11-05	13	10.3	14.8
2015-11-06	15	13.5	16.8
2015-11-07	16	13.9	17.8
2015-11-08	13.3	9.4	16.7
2015-11-09	13.2	11.4	16.6
2015-11-10	13.4	12.6	14.7
2015-11-11	12.1	11.1	12.9
2015-11-12	12.8	11.7	14.3
2015-11-13	10.6	5.9	13.2
2015-11-14	8.2	5.9	11.4
2015-11-15	13.4	11.3	14.5
2015-11-16	11.9	10.8	13
2015-11-17	13.1	10.3	15.2
2015-11-18	12.5	10.3	13.6
2015-11-19	10.4	7.4	13
2015-11-20	6.1	3.2	8.8
2015-11-21	3.3	0.5	4.6
2015-11-22	0.8	-1.3	4.2
2015-11-23	2.1	-3.8	7.5
2015-11-24	2.8	1.4	5
2015-11-25	4.6	0.9	7.1
2015-11-26	1.6	-2.9	8.6
2015-11-27	3.9	0.5	6.3
2015-11-28	5.7	2.2	8
2015-11-29	9.4	6.9	12
2015-11-30	8.7	5.7	11.9
2015-12-01	8.9	5.6	11.7
2015-12-02	10.4	9.3	11.3
2015-12-03	9	7.4	10
2015-12-04	8.6	7.6	9.9
2015-12-05	7.2	6.2	8.4
2015-12-06	9.5	6.4	11.6
2015-12-07	9.8	7.8	11.9
2015-12-08	9.7	7.3	12.4
2015-12-09	6.4	3.5	8.8
2015-12-10	5.3	4	7.2
2015-12-11	6	4.1	7.9
2015-12-12	6.2	1.4	11.5
2015-12-13	6.4	3.5	11.3
2015-12-14	7.1	5	9.8
2015-12-15	6.7	4.6	9.3
2015-12-16	10.8	8.5	12.2
2015-12-17	13.2	12	15.2
2015-12-18	11.3	9.8	12.9
2015-12-19	11.8	10.5	13.4
2015-12-20	11.5	10.4	12.5
2015-12-21	10.2	7.9	11.4
2015-12-22	12.4	9.9	14
2015-12-23	9.9	7.2	12.6
2015-12-24	9.8	6.7	13.2
2015-12-25	9	6.5	13.3
2015-12-26	12.5	10.6	13.8
2015-12-27	11.2	9.6	12.5
2015-12-28	8.9	5.1	11.6
2015-12-29	7.7	5.1	10
2015-12-30	6.5	4.6	8.6
2015-12-31	7.3	5.4	9.9

## Sheet: Text S1
Additional file 4: Text S1. Primers and probes for detection of B. microti and S. ixodetis, and qPCR protocol.

## Sheet: Table S2
Additional file 4: Table S2. Density of nymphs and number of analyzed nymphs for microorganisms per treatment, month and year.
		Density of nymphs per 200 m2				Analysed for microorganisms
Treatment	Month	Year				Year
		2012	2013	2014	2015	2012	2013	2014	2015
Control
	1		0	4	1		0	3	1
	2		0	2	0		0	1	0
	3		5	32	7		5	32	7
	4		14	202	45		14	132	44
	5		454	260	192		160	150	151
	6		581	238	502		160	158	160
	7		795	268	152		160	117	101
	8		440	133	217		160	128	145
	9	115	289	103	113	87	160	98	111
	10	113	173	61	105	113	137	60	94
	11	39	46	20	26	33	43	20	24
	12	0	8	13	7	0	6	13	7
	Total	267	2805	1336	1367	233	1005	912	845
Acorn addition
	1		0	5	0		0	5	0
	2		0	2	0		0	2	0
	3		20	75	8		20	70	8
	4		8	200	33		8	125	33
	5		463	212	139		130	131	113
	6		346	225	361		151	134	136
	7		483	222	103		152	142	84
	8		379	107	162		138	101	101
	9	79	198	99	65	76	125	94	64
	10	68	116	74	90	68	92	71	78
	11	27	25	16	10	17	20	16	9
	12	0	8	11	14	0	8	11	12
	Total	174	2046	1248	985	161	844	902	638
Rodent removal
	1		0	2	0		0	2	0
	2		0	1	0		0	1	0
	3		4	22	8		3	22	8
	4		7	90	52		7	78	42
	5		369	155	91		139	125	74
	6		450	142	283		147	112	131
	7		631	100	88		157	98	80
	8		365	43	101		136	39	93
	9	74	169	47	47	66	109	45	47
	10	62	97	53	35	61	77	53	34
	11	19	26	22	23	9	19	22	23
	12	0	4	3	3	0	4	3	3
	Total	155	2122	680	731	136	798	600	535

## Sheet: Table S3
Additional file 4: Table S3. Density of rodents and number of analyzed individuals for microorganisms per rodent species, treatment, month and year.
		Wood mouse						Bank vole
		Density per plot *			Analysed for microorganisms			Density per plot *			Analysed for microorganisms
Treatment	Month	Year			Year			Year			Year
		2012	2013	2014	2012	2013	2014	2012	2013	2014	2012	2013	2014
Control
	3		3.57663	18.3592		1	18		15.8804	11.5694		9	10
	6		5	50.6056		3	45		3	43.9664		3	18
	9	27.4618	10.7753	24.3443	19	3	11	24.6313	8.5	46.5179	9	4	20
	12	22.0769	24.2262	47.3833	14	18	26	34.5833	12	51.6803	5	9	22
	Total	49.5387	43.5781	140.692	33	25	100	59.2146	39.3804	153.734	14	25	70
Acorn addition
	3		13	47.8879		4	37		36.6663	29.7889		14	20
	6		11.55	103.78		8	47		14.1667	57.6938		6	13
	9	44.4236	13	55.4249	32	8	30	17.7619	40.5873	53.1478	5	5	14
	12	31.5556	71.4038	32.7143	10	36	23	47.8	35.2795	37.1845	8	17	18
	Total	75.9792	108.954	239.808	42	56	137	65.5619	126.7	177.815	13	42	65
Rodent removal
	3		1	3		1	3		3	5.94861		1	6
	6		1	24.3962		0	20		0	21.9048		0	13
	9	44.3548	0.628326	9.08625	27	0	6	23.8333	7.95259	31.0765	4	1	19
	12	8.82371	9.15623	27.9762	3	6	19	10.2988	10.5455	35.2	3	8	10
	Total	53.1785	11.7846	64.4587	30	7	48	34.1321	21.498	94.1299	7	10	48
* Rodent density was calculated per species according to the Schnabel method (Schnabel 1938)

## Sheet: Table S4
	Additional file 4: Table S4. Prevalences of tick-borne microorganisms in rodents and nymphs.
Microorganism	Wood mouse			Bank vole			Chi-squared	Nymphs Total			2012			2013			2014			2015
	N = 478	%	95% CI	N = 294	%	95% CI	p value	N= 7609	%	95% CI	N = 530	%	95% CI	N = 2647	%	95% CI	N = 2414	%	95% CI	N = 2018	%	95% CI
Babesia microti	2	0.41841	(-0.2-1.0)	20	6.80272	(3.9-9.7)	0.0001	38	0.499409	(0.3-0.7)	8	1.50943	(0.5-2.5)	10	0.377786	(0.1-0.6)	4	0.1657	(0.0-0.3)	16	0.792864	(0.4-1.2)
Borrelia burgdorferi s. l.	107	22.3849	(18.6-26.1)	83	28.2313	(23.1-33.4)	0.0694	1015	13.3395	(12.6-14.1)	62	11.6981	(9.0-14.4)	397	14.9981	(13.6-16.4)	273	11.309	(10.0-12.6)	283	14.0238	(12.5-15.5)
Borrelia afzelii*	107	22.3849	(18.6-26.1)	83	28.2313	(23.1-33.4)	0.0694	489	6.4266	(5.9-7.0)	34	6.41509	(4.3-8.5)	215	8.1224	(7.1-9.2)	110	4.55675	(3.7-5.4)	130	6.44202	(5.4-7.5)
Borrelia burgdorferi s. s.	-	-	-	-	-	-	-	9	0.118281	(0.0-0.2)	1	0.188679	(-0.2-0.6)	1	0.0377786	(0.0-0.1)	7	0.289975	(0.1-0.5)	0	0	(0.0-0.0)
Borrelia garinii	-	-	-	-	-	-	-	109	1.43251	(1.2-1.7)	6	1.13208	(0.2-2.0)	48	1.81337	(1.3-2.3)	25	1.03563	(0.6-1.4)	30	1.48662	(1.0-2.0)
Borrelia valaisiana	-	-	-	-	-	-	-	41	0.538836	(0.4-0.7)	0	0	(0.0-0.0)	17	0.642236	(0.3-0.9)	9	0.372825	(0.1-0.6)	15	0.74331	(0.4-1.1)
Borrelia miyamotoi	15	3.13808	(1.6-4.7)	5	1.70068	(0.2-3.2)	0.2326	227	2.98331	(2.6-3.4)	16	3.01887	(1.6-4.5)	62	2.34227	(1.8-2.9)	74	3.06545	(2.4-3.8)	75	3.71655	(2.9-4.5)
Neoehrlichia mikurensis	73	15.272	(12.0-18.5)	62	21.0884	(16.4-25.8)	0.0396	928	12.1961	(11.5-12.9)	59	11.1321	(8.5-13.8)	456	17.227	(15.8-18.7)	173	7.16653	(6.1-8.2)	240	11.893	(10.5-13.3)
Rickettsia helvetica	13	2.71967	(1.3-4.2)	5	1.70068	(0.2-3.2)	0.3703	322	4.23183	(3.8-4.7)	24	4.5283	(2.8-6.3)	112	4.23121	(3.5-5.0)	63	2.60978	(2.0-3.2)	123	6.09514	(5.1-7.1)
Spiroplasma ixodetis	33	6.90377	(4.6-9.2)	3	1.02041	(-0.1-2.2)	0.0002	1745	22.9334	(22.0-23.9)	108	20.3774	(16.9-23.8)	584	22.0627	(20.5-23.6)	581	24.0679	(22.4-25.8)	472	23.3895	(21.5-25.2)
* Borrelia burgdorferi s.l. in rodent biopsies has been assumed to be Borrelia afzelii (Coipan et al., 2018; Jahfari et al., 2017; Mysterud et al., 2019)

## Sheet: Table S5
Additional file 4: Table S5. All tested models for prediction of density of nymphs (DON), nymphal infection prevalence (NIP), and density of infected nymphs (DIN).

## Sheet: Table S6
Additional file 4: Table S6. Full equations for the best fitting models for prediction of density of nymphs (DON), nymphal infection prevalence (NIP), and density of infected nymphs (DIN)
